# Supplementary material for: Infrared spectra reveal box-like structures for a pentamer and hexamer of mixed carbon dioxide–acetylene clusters
Source: Royal Society of Chemistry journal article supplement (doi:10.1039/c5cp03842a), 2015-08-21
Supplement: c5cp03842a1.pdf [file c5cp03842a1.pdf]

Supplementary Information for:

**Infrared spectra reveal box-like structures for a pentamer and hexamer of mixed carbon dioxide-acetylene clusters**

by

M. Rezaei,<sup>1</sup> J. Norooz Oliiae,<sup>1</sup> N. Moazzen-Ahmadi,<sup>1</sup> and A.R.W. McKellar<sup>2</sup>

<sup>1</sup> *Department of Physics and Astronomy, University of Calgary, 2500 University Drive North West, Calgary, Alberta T2N 1N4, Canada*

<sup>2</sup> *National Research Council of Canada, Ottawa, Ontario K1A 0R6, Canada*

Table S1. Calculated structure of the lowest-energy isomer of  $(\text{CO}_2)_3\text{-(C}_2\text{H}_2)_2$  (principal axis system atomic coordinates in Å).

| Atom | a        | b        | c        |
|------|----------|----------|----------|
| C    | -2.70383 | -0.00004 | -0.00052 |
| O    | -2.70436 | -0.00229 | 1.16049  |
| O    | -2.70330 | 0.00221  | -1.16153 |
| C    | 0.76023  | -2.06214 | -0.00283 |
| O    | 1.91620  | -2.17026 | -0.00265 |
| O    | -0.39573 | -1.95403 | -0.00300 |
| C    | 0.76015  | 2.06217  | 0.00311  |
| O    | 1.91612  | 2.17030  | 0.00349  |
| O    | -0.39581 | 1.95402  | 0.00273  |
| C    | 1.59787  | 0.00342  | -2.38449 |
| H    | 2.64895  | 0.00316  | -2.24768 |
| C    | 0.40459  | 0.00371  | -2.53982 |
| H    | -0.64648 | 0.00396  | -2.67663 |
| C    | 1.59653  | -0.00337 | 2.38516  |
| H    | 2.64766  | -0.00308 | 2.24883  |
| C    | 0.40318  | -0.00371 | 2.53994  |
| H    | -0.64796 | -0.00400 | 2.67628  |
